# Supplementary material for: Kinetic Multi-omic Analysis of Responses to SARS-CoV-2 Infection in a Model of Severe COVID-19
Source: PubMed Central journal article supplement (PMC8475517; doi:10.1128/jvi.01010-21), 2021-09-27
Supplement: jvi.01010-21-s0001.pdf [file jvi.01010-21-s0001.pdf]

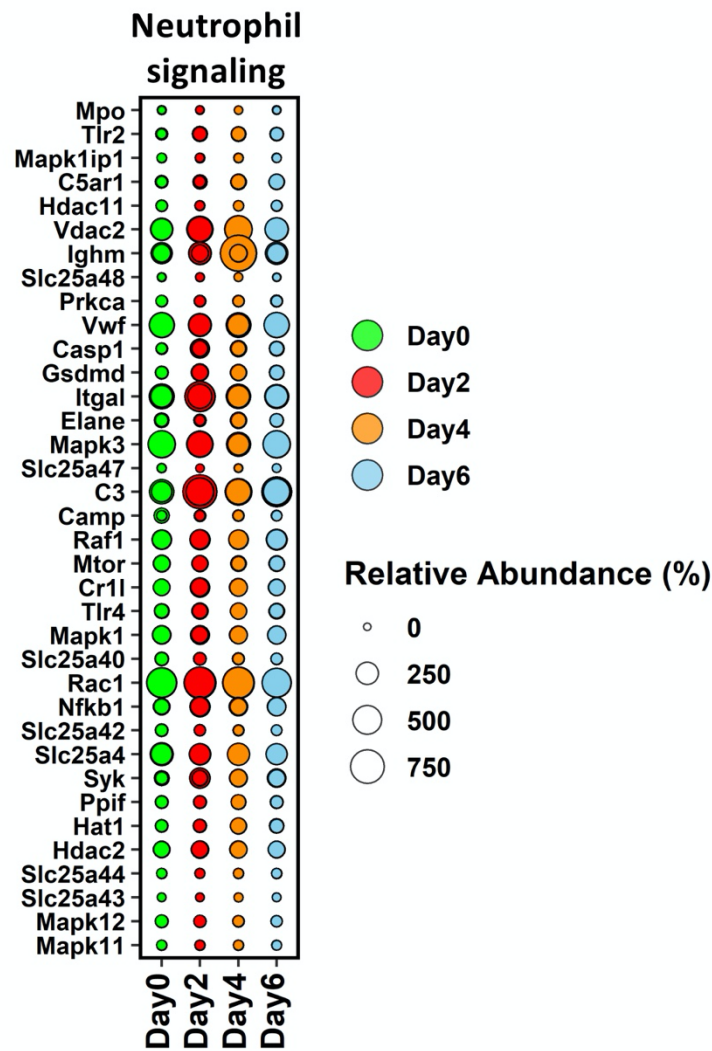

**Supplemental Figure 1: Severe SARS-CoV-2 infection leads to differential expression of transcripts associated with neutrophil activity.** Bubble plot of significantly changed transcripts associated with neutrophil activation and neutrophil extracellular trap formation. Bubble size denotes relative abundance and color shows time points: green (day 0, uninfected), red (day 2), orange (day 4) and blue (day 6).

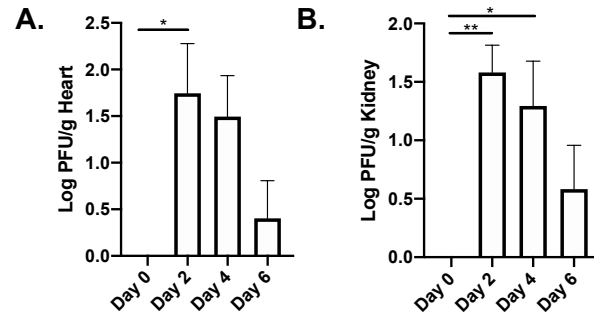

**Supplemental Figure 2: Viral titers in hearts and kidneys post intratracheal challenge of golden Syrian hamsters.** Male 5-to-6-week-old golden Syrian hamsters were intratracheally infected with SARS-CoV-2 strain USA-WA-1/2020 or mock challenged with vehicle (DMEM) and lungs excised at days 2, 4 and 6 post-infection. Log PFU per gram of tissue of **(A)** hearts and **(B)** kidneys assessed via plaque assays.

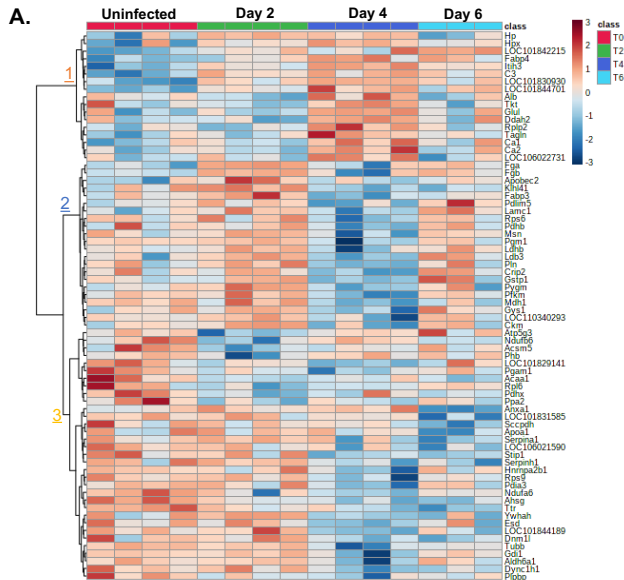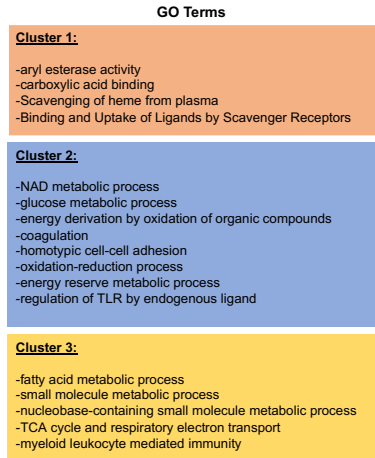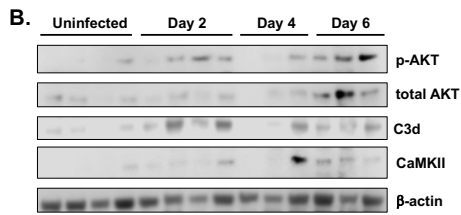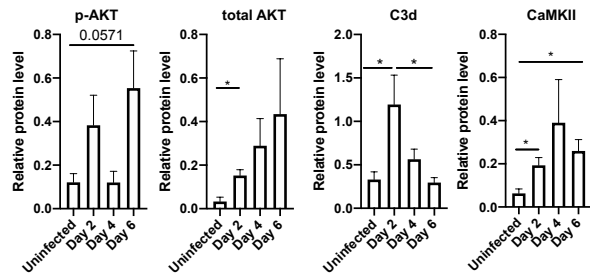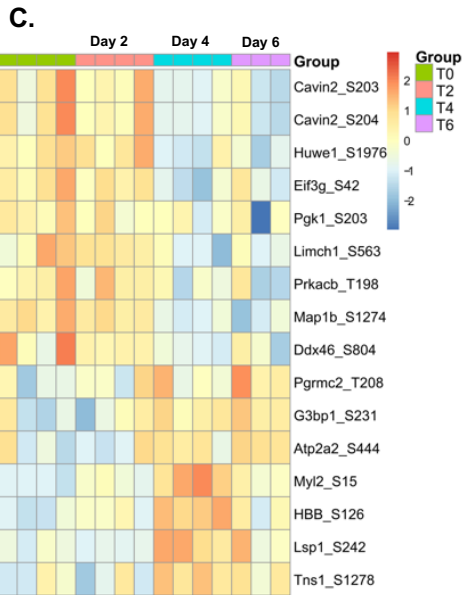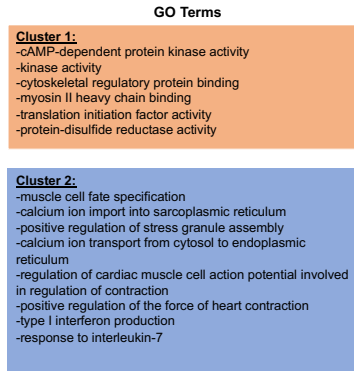

**Supplemental Figure 3: Severe SARS-CoV-2 leads to proteomic remodeling of hamster hearts.** Male 5-to-6-week-old golden Syrian hamsters were intratracheally infected with SARS-CoV-2 strain USA-WA-1/2020 or mock challenged with vehicle (DMEM) and hearts excised at days 2, 4 and 6 post-infection. **(A)** Proteomic changes of hamster lungs after SARS-CoV-2 infection or mock challenge (n = 3-4 per timepoint). Hierarchical clustering of LFQ intensities of significantly changed proteins (ANOVA, FDR < 0.01) revealed three distinct clusters. Their abundance profiles among the groups were plotted in the heatmap. Enriched GO biological process terms are indicated for each marked cluster. **(B)** Immunoblots for complement C3d, AKT, phospho-AKT, CamKII and actin as loading control (n = 3-4 per group). Histograms of protein level quantification (densitometry). Kruskal-Wallis test with Dunn's multiple-comparison post-test. Asterisks denote the level of significance observed: \* =  $p \leq 0.05$ . **(C)** Heatmap of phosphorylation changes of hamster kidney proteins after SARS-CoV-2 infection or mock challenge (n = 3-4 per timepoint). Hierarchical clustering of proteins with significantly changed phosphorylation state (ANOVA) revealed 2 distinct major clusters. Enriched GO biological process terms for each cluster are indicated.

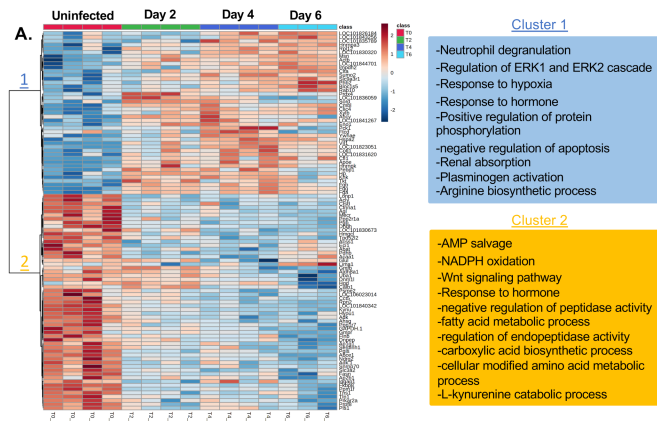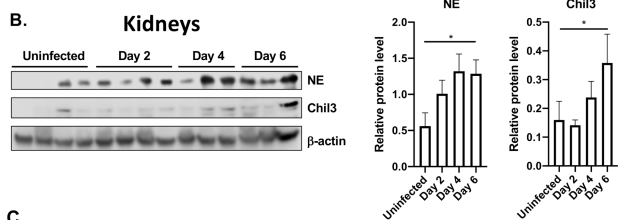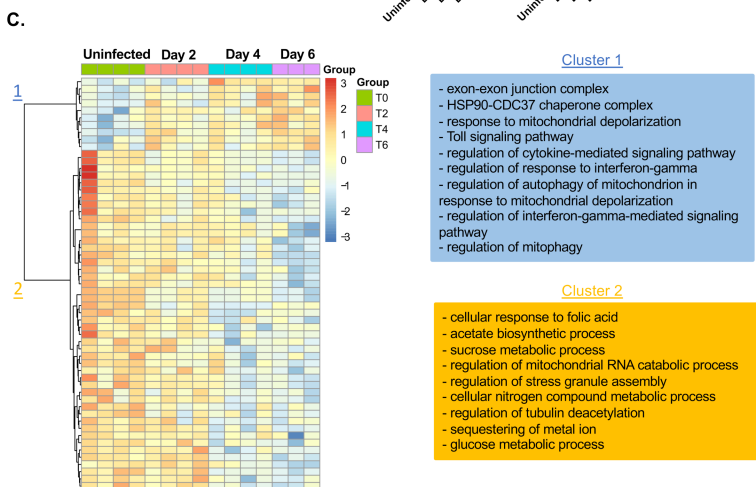

**Supplemental Figure 4: SARS-CoV-2 infection leads to proteomic changes associated with tissue injury.** Male 5-to-6-week-old golden Syrian hamsters were intratracheally infected with SARS-CoV-2 strain USA-WA-1/2020 or mock challenged with vehicle (DMEM) and kidneys excised at days 2, 4 and 6 post-infection. **(A)** Proteomic changes of hamster kidneys after SARS-CoV-2 infection or mock challenge (n = 3-4 per timepoint). Hierarchical clustering of LFQ intensities of significantly changed proteins (ANOVA, FDR < 0.01) revealed two distinct clusters. Their

abundance profiles among the groups were plotted in the heatmap. Enriched GO biological process terms are indicated for each marked cluster. **(B)** Immunoblots for neutrophil elastase (NE), chitinase 3 (Chil3) and actin as loading control (n = 3-4 per group). Histograms of protein level quantification (densitometry). Kruskal-Wallis test with Dunn's multiple-comparison post-test. Asterisks denote the level of significance observed: \* =  $p \leq 0.05$ . **(C)** Phosphoproteome analysis of kidneys after SARS-CoV-2 infection reveals temporal changes to mitochondrial health and immune responses. Male 5-to-6-week-old golden Syrian hamsters were intratracheally infected with SARS-CoV-2 strain USA-WA-1/2020 or mock challenged with vehicle (PBS) and kidneys excised at days 2, 4 and 6 post-infection.

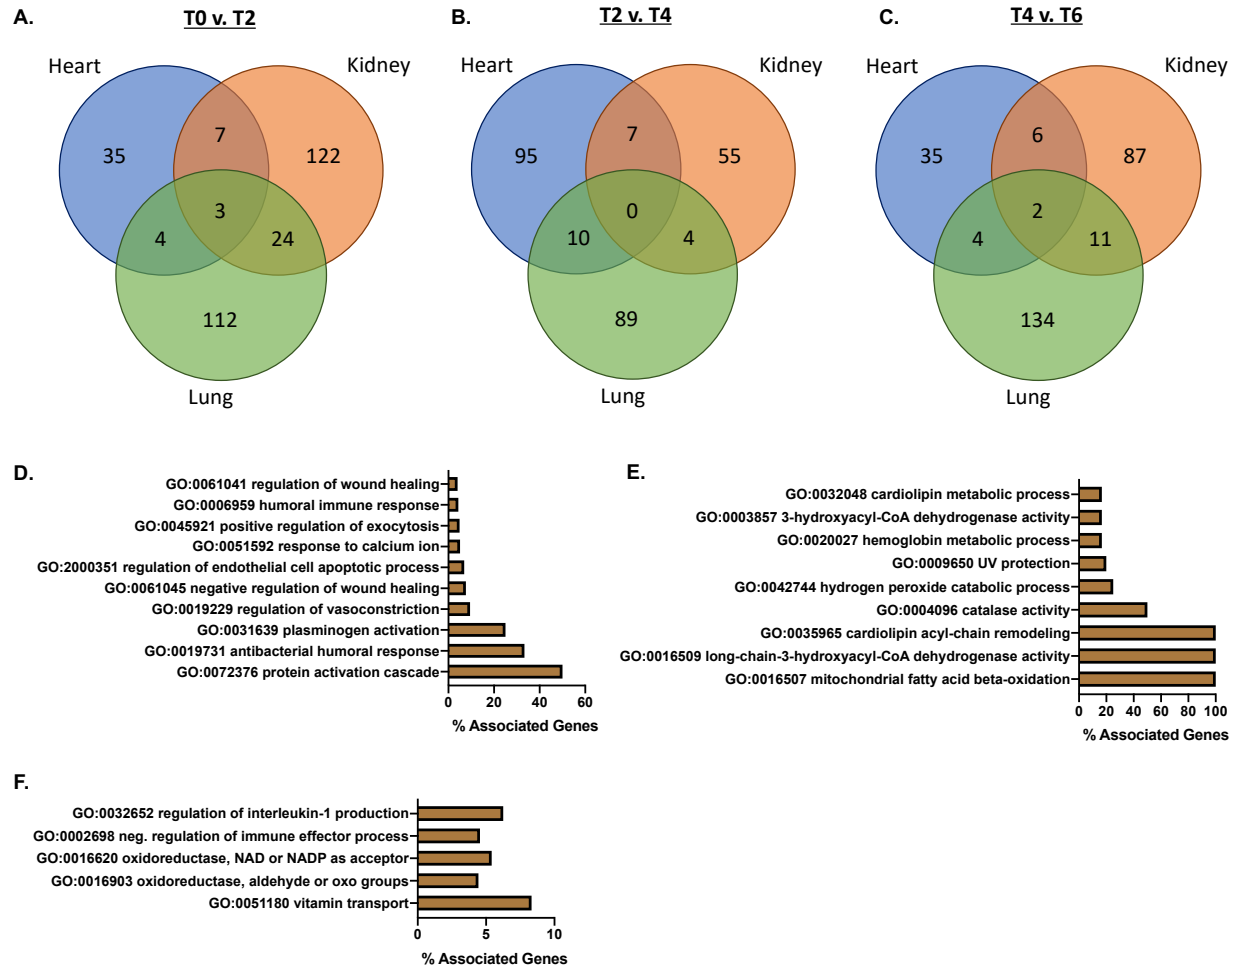

**Supplemental Figure 5: Integrated kinetic multi-proteomic analysis of heart, lungs and kidneys.** Venn diagram of shared proteins from global proteome analysis of lungs, hearts and kidneys at comparisons within times **(A)** T0/T2, **(B)** T2/T4 and **(C)** T4/T6. % associated genes of representative GO terms for **(D)** heart/lung/kidney at T0/T2, **(E)** heart/lung at T2/T4 and **(F)** heart/kidney/lung at T4/T6 shared factors.

**Supplemental Data Set 1.**

All phosphoproteins and GO terms associated with the phosphoproteome are shown.

**Supplemental Data Set 2.**

Full GO-term list with associated proteins and transcripts from the integrated omic analysis.

**Supplemental Data Set 3.**

All shared proteins and GO terms within lungs, hearts, and kidneys are presented.
